# Supplementary material
Source: PubMed Central journal article supplement (PMC10645305)
Supplement: gbad118_suppl_supplementary_tables.pdf [file gbad118_suppl_supplementary_tables.pdf]

**Supplementary Table 1.** Caregiving Arrangements by Region and Country, Survey of Aging, Health and Retirement in Europe (pooled 2015 and 2019 samples, N=112,963)

| <b>Disability Status</b>       | <b>Reports Difficulty with Activities of Daily Living</b>  |                                 |                       |                                          |                             | <b>No difficulty with ADLs</b> |
|--------------------------------|------------------------------------------------------------|---------------------------------|-----------------------|------------------------------------------|-----------------------------|--------------------------------|
| <b>Caregiving Arrangements</b> | <b>Care Gap: Neither family/ unpaid care nor paid care</b> | <b>Only family/ unpaid care</b> | <b>Only paid care</b> | <b>Both family/ unpaid and paid care</b> | <b>Live in nursing home</b> | <b>No Care Needed</b>          |
| <i>Eastern Europe</i>          | 7.6                                                        | 5.0                             | 0.3                   | 0.8                                      | 0.4                         | 85.9                           |
| Bulgaria                       | 6.4                                                        | 3.7                             | 0.3                   | 0.3                                      | 0.3                         | 89.1                           |
| Czech Republic                 | 7.2                                                        | 4.0                             | 0.2                   | 0.7                                      | 1.0                         | 87.0                           |
| Hungary                        | 8.2                                                        | 6.1                             | 0.1                   | 0.3                                      | 0.0                         | 85.3                           |
| Poland                         | 8.2                                                        | 4.9                             | 0.3                   | 0.9                                      | 0.4                         | 85.2                           |
| Romania                        | 6.9                                                        | 7.0                             | 0.1                   | 0.4                                      | 0.2                         | 85.4                           |
| Slovakia                       | 4.8                                                        | 2.8                             | 0.2                   | 1.9                                      | 0.0                         | 90.2                           |
| <i>Western Europe</i>          | 7.0                                                        | 1.9                             | 1.1                   | 1.9                                      | 1.3                         | 86.9                           |
| Austria                        | 4.1                                                        | 2.6                             | 0.8                   | 1.9                                      | 1.7                         | 89.0                           |
| Belgium                        | 9.2                                                        | 2.1                             | 2.0                   | 1.6                                      | 2.3                         | 82.8                           |
| France                         | 8.0                                                        | 2.3                             | 1.1                   | 1.3                                      | 1.3                         | 86.0                           |
| Germany                        | 6.8                                                        | 1.7                             | 1.1                   | 2.5                                      | 1.1                         | 86.9                           |
| Luxembourg                     | 3.7                                                        | 1.2                             | 1.0                   | 1.3                                      | 2.5                         | 90.3                           |
| Netherlands                    | 4.4                                                        | 1.0                             | 1.2                   | 0.8                                      | 1.0                         | 91.6                           |
| Switzerland                    | 4.3                                                        | 0.5                             | 0.7                   | 0.5                                      | 1.3                         | 92.7                           |
| <i>Northern Europe</i>         | 5.8                                                        | 1.6                             | 0.9                   | 0.5                                      | 1.0                         | 90.3                           |
| Denmark                        | 5.5                                                        | 0.9                             | 1.1                   | 0.6                                      | 1.4                         | 90.5                           |
| Estonia                        | 8.1                                                        | 4.6                             | 0.2                   | 0.6                                      | 0.9                         | 85.7                           |
| Finland                        | 6.0                                                        | 1.7                             | 0.4                   | 0.2                                      | 0.4                         | 91.2                           |
| Latvia                         | 4.1                                                        | 3.0                             | 0.4                   | 0.5                                      | 0.5                         | 91.5                           |
| Lithuania                      | 8.4                                                        | 4.1                             | 0.3                   | 0.5                                      | 0.2                         | 86.6                           |
| Sweden                         | 5.3                                                        | 1.0                             | 1.3                   | 0.5                                      | 1.1                         | 90.9                           |
| <i>Southern Europe</i>         | 4.3                                                        | 4.1                             | 0.8                   | 1.4                                      | 0.6                         | 88.8                           |
| Croatia                        | 5.9                                                        | 4.9                             | 0.2                   | 0.8                                      | 0.7                         | 87.6                           |
| Cyprus                         | 1.9                                                        | 0.8                             | 1.8                   | 2.2                                      | 0.1                         | 93.2                           |
| Greece                         | 2.8                                                        | 3.1                             | 0.3                   | 1.1                                      | 0.1                         | 92.6                           |
| Italy                          | 4.7                                                        | 4.2                             | 0.7                   | 1.0                                      | 0.5                         | 88.9                           |
| Malta                          | 1.7                                                        | 1.0                             | 0.2                   | 0.3                                      | 2.0                         | 94.9                           |
| Portugal                       | 10.8                                                       | 5.7                             | 0.8                   | 2.4                                      | 2.5                         | 77.9                           |
| Slovenia                       | 6.1                                                        | 3.9                             | 0.3                   | 0.6                                      | 0.8                         | 88.3                           |
| Spain                          | 3.2                                                        | 4.0                             | 1.1                   | 2.0                                      | 0.8                         | 88.9                           |
| <i>Israel</i>                  | 3.0                                                        | 1.9                             | 2.5                   | 2.6                                      | 0.9                         | 89.0                           |

Notes: Rows add to 100%. Weighted with person-level weights. The analytic sample is all respondents aged 50 and older. The total N=112,963.

**Supplementary Table 2.** Disability and Caregiving Arrangements by Age Group, Survey of Health, Aging and Retirement in Europe (2015 and 2019)

| Disability Status | Reports Difficulty with Activities of Daily Living  |                          |                |                                   |                         |                 | No difficulty with Activities of Daily Living | <i>Total</i> |
|-------------------|-----------------------------------------------------|--------------------------|----------------|-----------------------------------|-------------------------|-----------------|-----------------------------------------------|--------------|
|                   | Care Gap: Neither family/ unpaid care nor paid care | Only family/ unpaid care | Only paid care | Both family/ unpaid and paid care | Lives in a nursing home | No Care Needed  |                                               |              |
| <b>Age</b>        |                                                     |                          |                |                                   |                         |                 |                                               |              |
| Age 50-69         | 4.5 <sup>a b c d</sup>                              | 1.6                      | 0.2            | 0.4                               | 0.3                     | 93.1            | 63,035                                        | 100%         |
| Age 70 +          | 9.1 <sup>a b c d</sup>                              | 5.7                      | 2.2            | 3.5                               | 2.1                     | 77.4            | 49,928                                        | 100%         |
| <i>Total</i>      | 6,886<br>6.1%                                       | 3,796<br>3.1%            | 959<br>0.9%    | 1,536<br>1.5%                     | 1,178<br>0.9%           | 98,608<br>87.5% | 112,963                                       | 100%         |

Notes: Sample weighted using person-level weights. The analytic sample is all respondents aged 50 and older. The total N=112,963. We tested whether respondents with a care gap differ significantly by two age groups from the following groups: respondents with only family/unpaid care (a), those who received only paid care (b), those who received both family/unpaid and paid care (c), and those living in nursing homes (d) ( $p < .05$ ).

**Supplementary Table 3.** Relative risk ratios from multinomial logistic regression model by age group predicting caregiving arrangements among respondents who report difficulty with ADLs or live in a nursing home, SHARE (2015 and 2019)

|                                                   | <b>Care Gap: Neither family/unpaid care nor paid care</b><br>vs. Only family/unpaid care | <b>Only paid care</b><br>vs. Only family/unpaid care | <b>Both family/unpaid and paid care</b><br>vs. Only family/unpaid care | <b>Live in nursing home</b><br>vs. Only family/unpaid care |
|---------------------------------------------------|------------------------------------------------------------------------------------------|------------------------------------------------------|------------------------------------------------------------------------|------------------------------------------------------------|
| <b>Model for Age 50-69</b>                        |                                                                                          |                                                      |                                                                        |                                                            |
| <u>Family structure</u> (Partnered, has children) |                                                                                          |                                                      |                                                                        |                                                            |
| Partnered, no child(ren)                          | 0.63                                                                                     | 0.28                                                 | 0.88                                                                   | 0.59                                                       |
| Un-partnered, has child(ren)                      | 1.84*                                                                                    | 13.35***                                             | 1.5                                                                    | 8.05***                                                    |
| Un-partnered, no children                         | 1.87                                                                                     | 25.04***                                             | 2.83*                                                                  | 18.44***                                                   |
| Men (Women)                                       | 0.79                                                                                     | 0.79                                                 | 0.56*                                                                  | 1.60                                                       |
| Education (Less than upper secondary education)   |                                                                                          |                                                      |                                                                        |                                                            |
| Upper secondary and vocational training           | 1.17                                                                                     | 0.87                                                 | 1.14                                                                   | 0.73                                                       |
| Tertiary education                                | 1.54*                                                                                    | 0.98                                                 | 1.71                                                                   | 1.33                                                       |
| Total wealth (<=49,999, Euros)                    |                                                                                          |                                                      |                                                                        |                                                            |
| 50k-149,999                                       | 0.72                                                                                     | 0.33                                                 | 0.45*                                                                  | 0.19*                                                      |
| 150k-500k                                         | 1.81**                                                                                   | 1.32                                                 | 1.18                                                                   | 0.34                                                       |
| >=500k                                            | 0.996                                                                                    | 2.23                                                 | 0.28*                                                                  | 0.09**                                                     |
| Number of difficulties with ADLs                  |                                                                                          |                                                      |                                                                        |                                                            |
|                                                   | 0.76***                                                                                  | 1.10                                                 | 1.39***                                                                | 0.66                                                       |
| Regions (Western Europe)                          |                                                                                          |                                                      |                                                                        |                                                            |
| Northern Europe                                   | 0.92                                                                                     | 1.68                                                 | 0.57                                                                   | 1.06                                                       |
| Southern Europe                                   | 0.41***                                                                                  | 0.46                                                 | 0.26**                                                                 | 0.81                                                       |
| Eastern Europe                                    | 0.62*                                                                                    | 0.08***                                              | 0.25***                                                                | 0.34                                                       |
| Israel                                            | 0.24**                                                                                   | 2.12                                                 | 0.73                                                                   | 0.30                                                       |
| <i>Constant</i>                                   | 5.53***                                                                                  | 0.05***                                              | 0.23***                                                                | 0.21                                                       |
| <b>Model for Age 70+</b>                          |                                                                                          |                                                      |                                                                        |                                                            |
| <u>Family structure</u> (Partnered, has children) |                                                                                          |                                                      |                                                                        |                                                            |
| Partnered, no child(ren)                          | 1.19                                                                                     | 3.38**                                               | 1.52                                                                   | 0.90                                                       |
| Un-partnered, has child(ren)                      | 1.72***                                                                                  | 3.33***                                              | 1.42*                                                                  | 4.37***                                                    |
| Un-partnered, no children                         | 2.74***                                                                                  | 6.62***                                              | 1.75*                                                                  | 18.45***                                                   |
| Men (Women)                                       | 0.94                                                                                     | 0.83                                                 | 0.86                                                                   | 0.95                                                       |
| Education (Less than upper secondary education)   |                                                                                          |                                                      |                                                                        |                                                            |
| Upper secondary and vocational training           | 1.61***                                                                                  | 1.06                                                 | 1.37*                                                                  | 0.94                                                       |
| Tertiary education                                | 1.67**                                                                                   | 0.92                                                 | 1.17                                                                   | 1.74*                                                      |
| Total wealth (<=49,999, Euros)                    |                                                                                          |                                                      |                                                                        |                                                            |
| 50k-149,999                                       | 1.36*                                                                                    | 1.02                                                 | 0.84                                                                   | 0.29***                                                    |
| 150k-500k                                         | 1.54**                                                                                   | 1.10                                                 | 0.86                                                                   | 0.19***                                                    |
| >=500k                                            | 1.39                                                                                     | 0.48**                                               | 0.87                                                                   | 0.22***                                                    |
| Number of difficulties with ADLs                  |                                                                                          |                                                      |                                                                        |                                                            |
|                                                   | 0.70***                                                                                  | 0.99                                                 | 1.27***                                                                | 1.03                                                       |
| Regions (Western Europe)                          |                                                                                          |                                                      |                                                                        |                                                            |
| Northern Europe                                   | 1.11                                                                                     | 0.95                                                 | 0.25***                                                                | 0.89                                                       |
| Southern Europe                                   | 0.39***                                                                                  | 0.23***                                              | 0.28***                                                                | 0.18***                                                    |
| Eastern Europe                                    | 0.50***                                                                                  | 0.07***                                              | 0.10***                                                                | 0.04***                                                    |
| Israel                                            | 0.85                                                                                     | 3.30***                                              | 1.61*                                                                  | 1.31                                                       |
| <i>Constant</i>                                   | 2.92***                                                                                  | 0.44***                                              | 0.59**                                                                 | 0.53*                                                      |

\* p<.05; \*\* p<.01; \*\*\* p<.001

Notes: The analytic sample is respondents aged 50 and older who have difficulty with at least one ADL or live in a nursing home. The total N=14,355.

**Supplementary Table 4.** Sources of help by family structure by age group, among respondents reporting difficulty with ADLs or living in nursing homes, SHARE (2015 and 2019)

| <b>Family Structure</b>                            |                                                                          |                            |                             |                                 |                                           |
|----------------------------------------------------|--------------------------------------------------------------------------|----------------------------|-----------------------------|---------------------------------|-------------------------------------------|
|                                                    | <b>Respondents aged<br/>50-69 reporting<br/>difficulty with<br/>ADLs</b> | Partnered,<br>has children | Partnered, no<br>child(ren) | Un-partnered, has<br>child(ren) | Kinless: Un-<br>partnered, no<br>children |
| <b>Sources of Help</b>                             |                                                                          |                            |                             |                                 |                                           |
| Spouse/partner only                                | 14.6                                                                     | 21.1 <sup>d</sup>          | 33.3                        | NA                              | NA                                        |
| Children only                                      | 3.4                                                                      | 1.8                        | NA                          | 9.5 <sup>e</sup>                | NA                                        |
| Mix of family members                              | 4.2                                                                      | 3.0                        | 0.0                         | 5.2                             | 12.4 <sup>a c</sup>                       |
| Non-family members only                            | 3.5                                                                      | 1.2                        | 0.4                         | 6.7                             | 11.9 <sup>a b c</sup>                     |
| Mix of family and non-family members               | 5.5                                                                      | 5.9                        | 5.5                         | 4.2                             | 5.9 <sup>b c</sup>                        |
| Live in nursing home                               | 3.8                                                                      | 1.3                        | 1.3                         | 6.3                             | 14.6 <sup>a b c</sup>                     |
| Care Gap: Neither family/unpaid care nor paid care | 65.1                                                                     | 65.8                       | 59.5                        | 68.1                            | 55.2 <sup>a b c</sup>                     |
|                                                    | <b>Respondents aged<br/>70+ reporting<br/>difficulty with<br/>ADLs</b>   | Partnered,<br>has children | Partnered, no<br>child(ren) | Un-partnered, has<br>child(ren) | Kinless: Un-<br>partnered, no<br>children |
| <b>Sources of Help</b>                             |                                                                          |                            |                             |                                 |                                           |
| Spouse/partner only                                | 8.9                                                                      | 21.7 <sup>d</sup>          | 14.5                        | NA                              | NA                                        |
| Children only                                      | 11.8                                                                     | 5.5                        | NA                          | 19.6 <sup>e</sup>               | NA                                        |
| Mix of family members                              | 3.0                                                                      | 3.7                        | 5.4                         | 1.2                             | 9.2 <sup>a b c</sup>                      |
| Non-family members only                            | 13.8                                                                     | 8.2                        | 22.8                        | 16.3                            | 21.6 <sup>a b c</sup>                     |
| Mix of family and non-family members               | 13.1                                                                     | 15.2                       | 17.1                        | 12.4                            | 6.9 <sup>a b c</sup>                      |
| Live in nursing home                               | 9.1                                                                      | 3.1                        | 2.3                         | 11.2                            | 25.2 <sup>a b c</sup>                     |
| Care Gap: Neither family/unpaid care nor paid care | 40.4                                                                     | 42.7                       | 37.9                        | 39.3                            | 37.2 <sup>a b c</sup>                     |
| <i>Total</i>                                       | <i>100</i>                                                               | <i>100</i>                 | <i>100</i>                  | <i>100</i>                      | <i>100</i>                                |

Notes: The analytic sample is respondents aged 50 and older who have difficulty with at least one ADL or live in a nursing home. The total N=14,355. We tested whether kinless respondents differ significantly from respondents with a partner and children (a), with a partner and no children (b), no partner and children (c). We also tested differences between those with a partner and no children from those with a partner and children (d), and differences between no partner and children from those with a partner and children (e) ( $p < .05$ ).

**Supplementary Table 5.** Relative risk ratios from multinomial logistic regression model predicting caregiving arrangements among respondents who report difficulty with ADLs or live in a nursing home, Survey of Aging, Health and Retirement in Europe (*All respondents with one wave each.*)

|                                                        | <b>Care Gap:<br/>Neither<br/>family/unpaid<br/>care nor paid<br/>care</b><br>vs. Only family/<br>unpaid care | <b>Only paid care</b><br>vs. Only family/<br>unpaid care | <b>Both<br/>family/unpaid<br/>and paid care</b><br>vs. Only family/<br>unpaid care | <b>Live in nursing<br/>home</b><br>vs. Only family/<br>unpaid care |
|--------------------------------------------------------|--------------------------------------------------------------------------------------------------------------|----------------------------------------------------------|------------------------------------------------------------------------------------|--------------------------------------------------------------------|
| <b>Family structure</b> (Partnered, has children)      |                                                                                                              |                                                          |                                                                                    |                                                                    |
| Partnered, no child(ren)                               | 1.002                                                                                                        | 1.79                                                     | 0.86                                                                               | 0.73                                                               |
| Un-partnered, has child(ren)                           | 1.61***                                                                                                      | 5.09***                                                  | 1.16                                                                               | 4.44***                                                            |
| Un-partnered, no children                              | 2.07***                                                                                                      | 9.14***                                                  | 1.76*                                                                              | 20.04***                                                           |
| Men (Women)                                            | 0.92                                                                                                         | 0.99                                                     | 0.81                                                                               | 1.15                                                               |
| <b>Age</b> (50-59)                                     |                                                                                                              |                                                          |                                                                                    |                                                                    |
| 55-59                                                  | 0.80                                                                                                         | 1.76                                                     | 1.87                                                                               | 13.51***                                                           |
| 60-64                                                  | 1.01                                                                                                         | 2.51                                                     | 2.35                                                                               | 8.18**                                                             |
| 65-69                                                  | 1.20                                                                                                         | 4.68**                                                   | 3.15                                                                               | 8.23**                                                             |
| 70-74                                                  | 0.74                                                                                                         | 4.29*                                                    | 3.28                                                                               | 6.72**                                                             |
| 75-79                                                  | 0.85                                                                                                         | 3.86*                                                    | 3.82*                                                                              | 8.96***                                                            |
| 80+                                                    | 0.50**                                                                                                       | 6.58***                                                  | 5.41**                                                                             | 19.24***                                                           |
| <b>Education</b> (Less than upper secondary education) |                                                                                                              |                                                          |                                                                                    |                                                                    |
| Upper secondary and vocational training                | 1.38**                                                                                                       | 1.30                                                     | 1.46*                                                                              | 1.01                                                               |
| Tertiary education                                     | 1.46*                                                                                                        | 1.61                                                     | 1.38                                                                               | 2.28**                                                             |
| <b>Total wealth</b> (<=49,999, Euros)                  |                                                                                                              |                                                          |                                                                                    |                                                                    |
| 50k-149,999                                            | 1.12                                                                                                         | 0.79                                                     | 0.74                                                                               | 0.24***                                                            |
| 150k-500k                                              | 1.69***                                                                                                      | 1.21                                                     | 0.94                                                                               | 0.20***                                                            |
| >=500k                                                 | 1.28                                                                                                         | 0.70                                                     | 0.92                                                                               | 0.30**                                                             |
| Number of difficulties with ADLs                       | 0.68***                                                                                                      | 0.97                                                     | 1.34***                                                                            | 1.02                                                               |
| <b>Regions</b> (Western Europe)                        |                                                                                                              |                                                          |                                                                                    |                                                                    |
| Northern Europe                                        | 0.99                                                                                                         | 0.80                                                     | 0.25***                                                                            | 0.78                                                               |
| Southern Europe                                        | 0.41***                                                                                                      | 0.28***                                                  | 0.25***                                                                            | 0.29***                                                            |
| Eastern Europe                                         | 0.52***                                                                                                      | 0.07***                                                  | 0.10***                                                                            | 0.07***                                                            |
| Israel                                                 | 0.58                                                                                                         | 2.02*                                                    | 1.01                                                                               | 0.77                                                               |
| <i>Constant</i>                                        | 5.30***                                                                                                      | 0.04***                                                  | 0.13***                                                                            | 0.02***                                                            |

\* p<.05; \*\* p<.01; \*\*\* p<.001

Notes: The analytic sample is respondents aged 50 and older who have difficulty with at least one ADL or live in a nursing home. Total sample size= 10,133.
